# Supplementary material for: Design, synthesis and photochromism studies of thienyl containing triarylethylene derivatives and their applications in real-time photoresponsive surfaces
Source: Royal Society of Chemistry journal article supplement (doi:10.1039/c8tc02698j), 2018-01-01
Supplement: c8tc02698j1.pdf [file c8tc02698j1.pdf]

## Supporting Information

### 1 Synthetic details

The details of the synthetic procedures for 2ThDp, 2ThDpF, 3ThDp and 3ThDpF are listed in Scheme S1. Thiophene-2-carbaldehyde, thiophene-3-carbaldehyde, carbon tetrabromide and triphenylphosphine were purchased from Sigma–Aldrich Chemical Co.. Phenylboronic acid, (4-fluorophenyl)boronic acid, Pd(PPh<sub>3</sub>)<sub>4</sub>, and K<sub>2</sub>CO<sub>3</sub> were purchased from Aladdin Chemical Co.. All chemicals were of analytical grade and used as received. Compound 2-(2,2-dibromovinyl)thiophene and 3-(2,2-dibromovinyl)thiophene was synthesized according to previous reports.<sup>[1]</sup> All the final compounds were characterized by <sup>1</sup>H NMR spectroscopy, high-resolution EI mass spectroscopy and elemental analysis. All solvents were distilled and purified according to standard procedures before use.

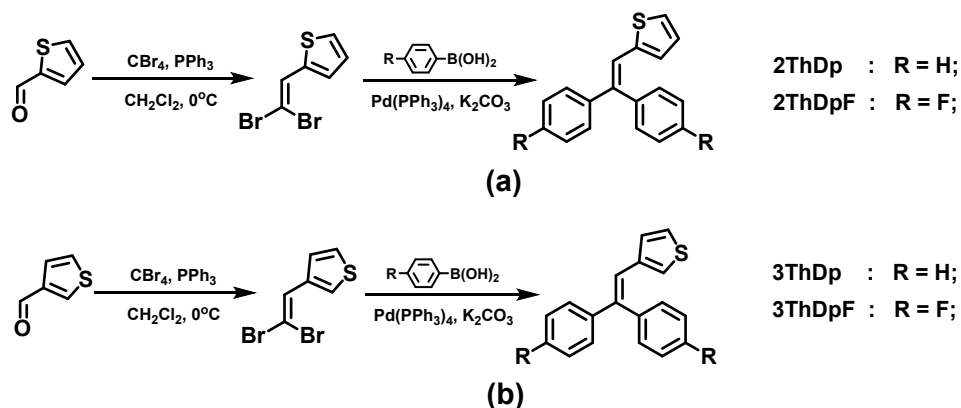

**Scheme S1** (a) Synthetic routes for compounds 2ThDp and 2ThDpF; (b) Synthetic routes for compounds 3ThDp and 3ThDpF.

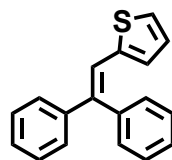

**2-(2,2-diphenylvinyl)thiophene (2ThDp)** To a mixture of 2-(2,2-dibromovinyl)thiophene (1.34 g, 5.0 mmol) and phenylboronic acid (1.83 g 15.0 mmol) in degassed THF (30 ml) was added 2M K<sub>2</sub>CO<sub>3</sub> aqueous solution (10 ml). After degassing for 20 minutes, Pd(PPh<sub>3</sub>)<sub>4</sub> (100mg, 0.10 mmol) was added to the mixture. The resulting mixture was stirred at reflux for 24 hours under an argon atmosphere.

After cooling down to room temperature, the mixture was filtered and the filtrate was purified by column chromatography with hexane as eluent. The residue was purified by recrystallization by CH<sub>2</sub>Cl<sub>2</sub>-hexane mixed solvent system. Colorless oil was achieved. Yield: 0.76 g (58 %). <sup>1</sup>H NMR (500 MHz, CDCl<sub>3</sub>, 298 K): δ = 7.43–7.49 (m, 3H), 7.28–7.34 (m, 7H), 7.22–7.24 (m, 1H), 7.03–7.04 (m, 1H), 6.91–6.92 (m, 1H), 6.86–6.87 (m, 1H); High solution EI-MS: m/z 262.0809 [M]<sup>+</sup>; calcd for C<sub>18</sub>H<sub>14</sub>S: 262.0816. Elemental analyses (%) calcd for C<sub>18</sub>H<sub>14</sub>S: C 82.40, H 5.38; found: C 82.12, H 5.77.

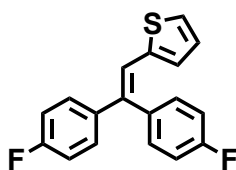

**2-(2,2-bis(4-fluorophenyl)vinyl)thiophene (2ThDpF)** This compound was prepared according to the aforementioned procedure for 2ThDp except that phenylboronic acid (1.83 g 15.0 mmol) was replaced with (4-fluorophenyl)boronic acid (2.10 g 15.0 mmol). A white solid was achieved. Yield: 1.15 g (77 %). <sup>1</sup>H NMR (500 MHz, deuterated DMSO, 298 K): δ = 7.50 (s, 1H), 7.31–7.38 (m, 5H), 7.25–7.28 (m, 2H), 7.14–7.19 (m, 3H), 6.94–6.96 (m, 1H). High solution EI-MS: m/z found: 298.0620 [M]<sup>+</sup>; calcd for C<sub>18</sub>H<sub>12</sub>F<sub>2</sub>S: 298.0628. Elemental analyses (%) calcd for C<sub>18</sub>H<sub>12</sub>F<sub>2</sub>S: C 72.46, H 4.05; found: C 72.12, H 4.32.

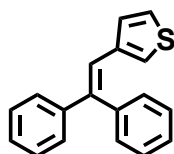

**3-(2,2-diphenylvinyl)thiophene (3ThDp)** This compound was prepared according to the aforementioned procedure for 2ThDp except that 2-(2,2-dibromovinyl)thiophene (1.34 g, 5.0 mmol) was replaced with 3-(2,2-dibromovinyl)thiophene (1.34 g, 5.0 mmol). A white solid was achieved. Yield: 0.95 g (72 %). <sup>1</sup>H NMR (500 MHz, deuterated DMSO, 298 K): δ = 7.42–7.49 (m, 3H), 7.26–7.35 (m, 6H), 7.18–7.21 (m, 3H), 7.13–7.14 (m, 1H), 6.32–6.33 (m, 1H); High solution EI-MS: m/z 262.0809 [M]<sup>+</sup>; calcd for C<sub>18</sub>H<sub>14</sub>S: 262.0816. Elemental analyses (%) calcd for C<sub>18</sub>H<sub>14</sub>S: C 82.40, H 5.38; found: C 81.97, H 5.59.

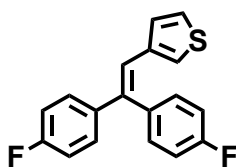

**3-(2,2-bis(4-fluorophenyl)vinyl)thiophene (3ThDpF)** This compound was prepared according to the aforementioned procedure for 2ThDp except that 2-(2,2-dibromovinyl)thiophene (1.34 g, 5.0 mmol) and phenylboronic acid (1.83 g 15.0 mmol) were replaced with 3-(2,2-dibromovinyl)thiophene (1.34 g, 5.0 mmol) and (4-fluorophenyl)boronic acid (2.10 g 15.0 mmol) respectively. Yield: 1.21 g (81 %).  $^1\text{H}$  NMR (500 MHz, deuterated DMSO, 298 K):  $\delta = 7.29\text{--}7.34$  (m, 5H), 7.20–7.24 (m, 2H), 7.16–7.19 (m, 4H), 6.35–6.36 (m, 1H); High resolution EI-MS:  $m/z$  found: 298.0624  $[\text{M}]^+$ ; calcd for  $\text{C}_{18}\text{H}_{12}\text{F}_2\text{S}$ : 298.0628. Elemental analyses (%) calcd for  $\text{C}_{18}\text{H}_{12}\text{F}_2\text{S}$ : C 72.46, H 4.05; found: C 72.21, H 4.17.

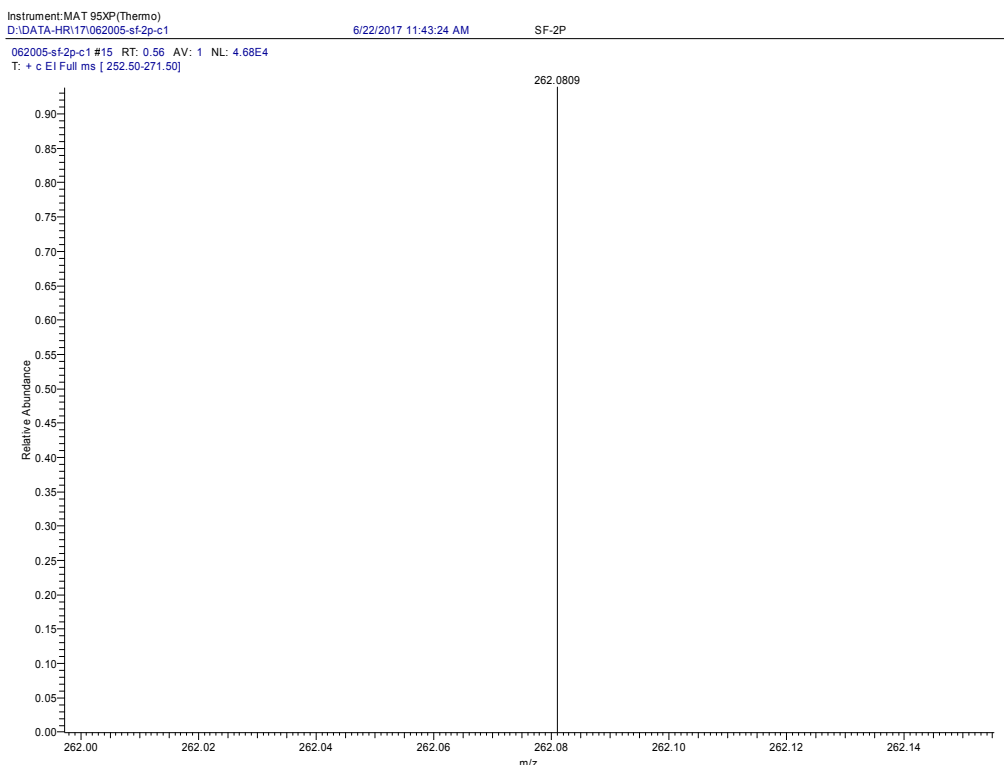

**Figure S1** High Resolution EI mass spectrum of compound 2ThDp.

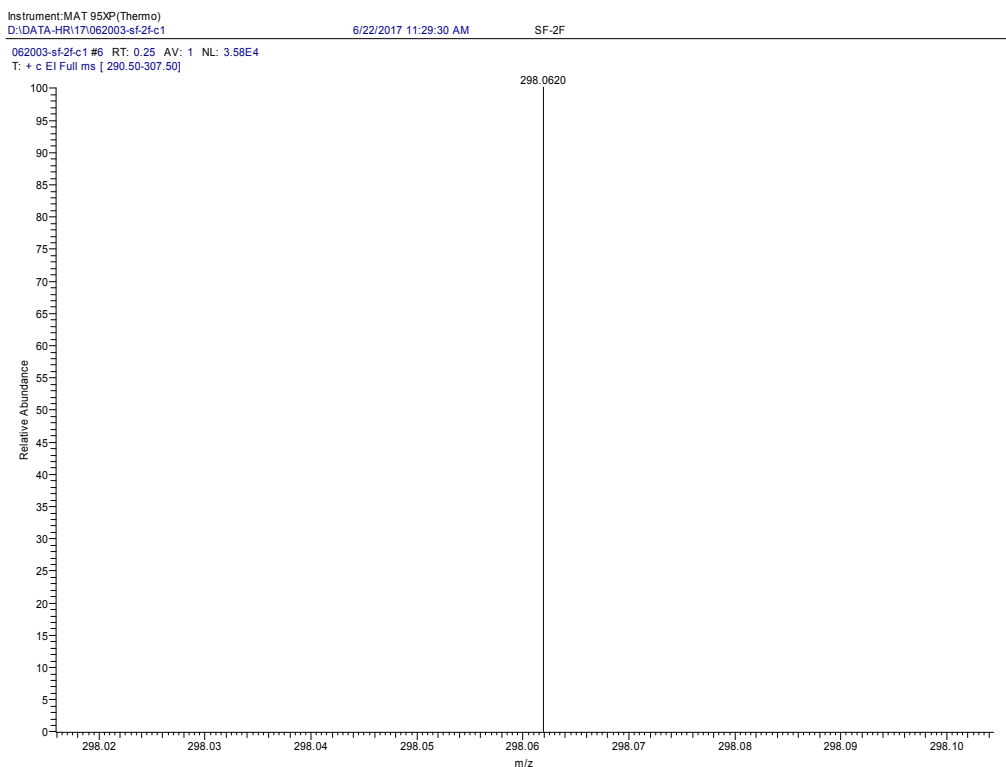

**Figure S2** High Resolution EI mass spectrum of compound 2ThDpF.

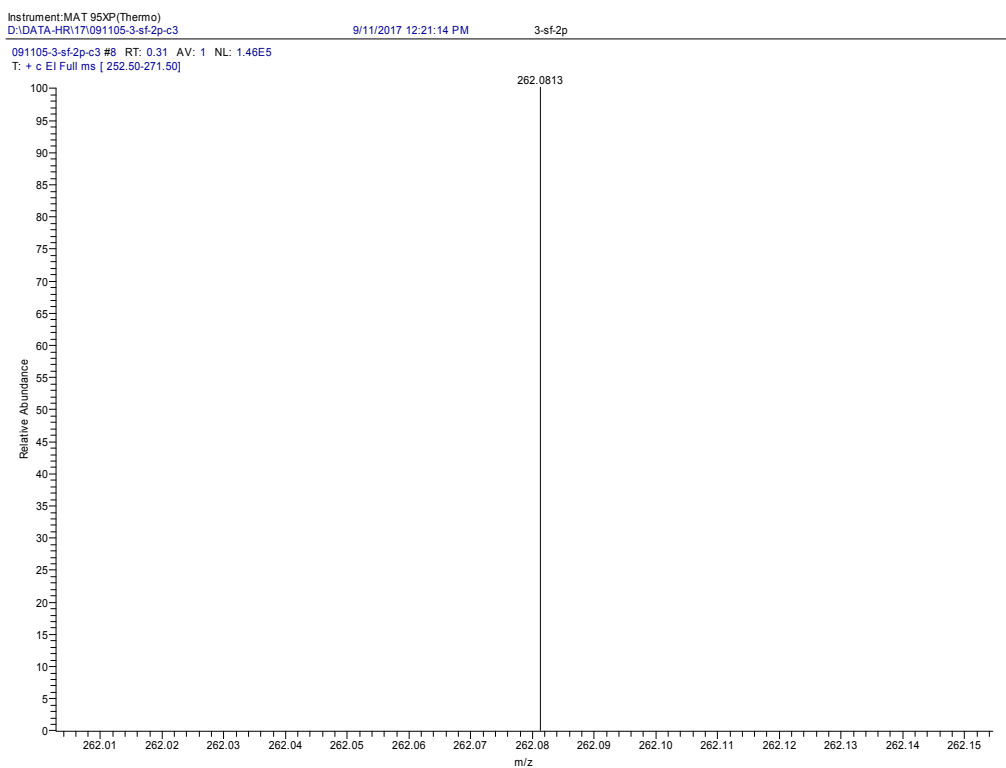

**Figure S3** High Resolution EI mass spectrum of compound 3ThDp.

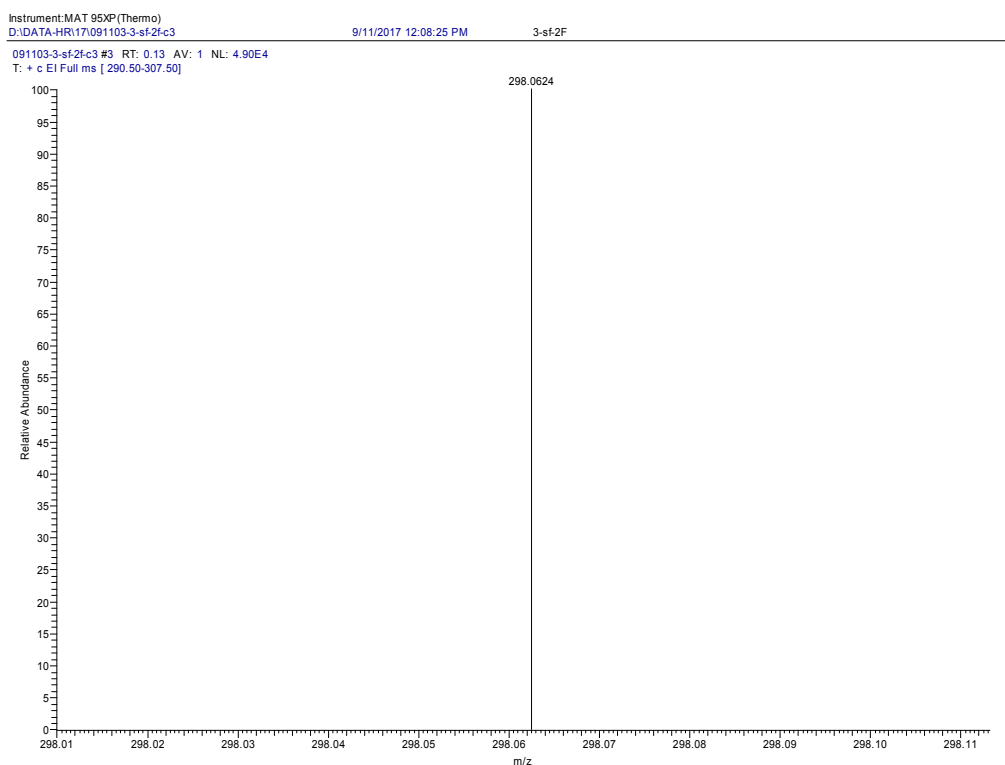

**Figure S4** High Resolution EI mass spectrum of compound 3ThDpF.

## 2 Physical measurements and instrumentations

$^1\text{H}$  NMR spectra were obtained using a Bruker Avance III 500 NMR (Nuclear Magnetic Resonance Spectrometer) with chemical shifts recorded relative to tetramethylsilane (TMS).  $^1\text{H}$ - $^1\text{H}$  COSY spectra were measured with a Bruker AVANCE 600 Nuclear Magnetic Resonance Spectrometer. Positive ion EI mass spectra were performed using a Thermo MAT95XP high resolution mass spectrometer. The elemental analysis was performed using a Vario EL analyzer. Single-crystal X-ray data for 3ThDpF was determined on an Oxford Diffraction Gemini S Ultra X-ray Single Crystal Diffractometer using a (Cu) X-ray source. UV-vis reflectance spectra were recorded using an Ocean Optic Maya2000PRO spectrometer with Ocean Optic reflection probes R600-125F. Steady state fluorescence studies were conducted using a Horiba Scientific Fluorolog-3 spectrofluorometer.

### 3 Photophysical data and spectra

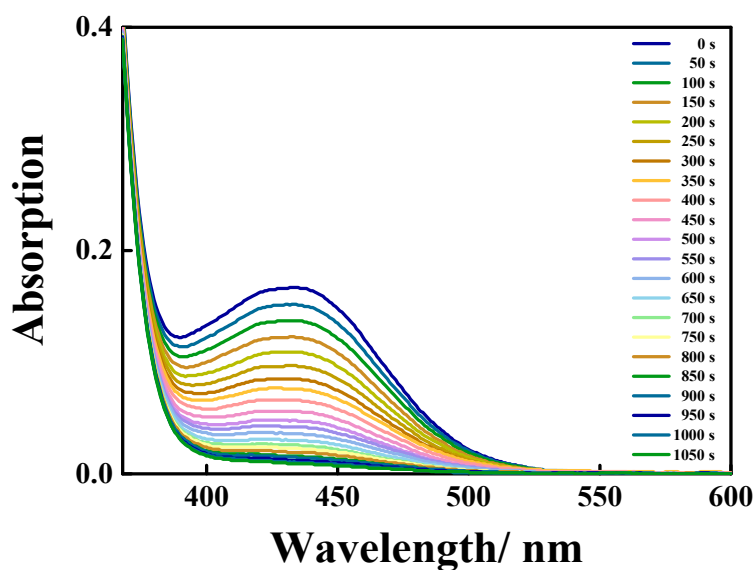

**Figure S5** Time-dependent UV-vis absorption spectra of 2ThDpF during the photochromic bleaching process (in degassed THF solution, with concentration of  $1.0 \times 10^{-3}$  M).

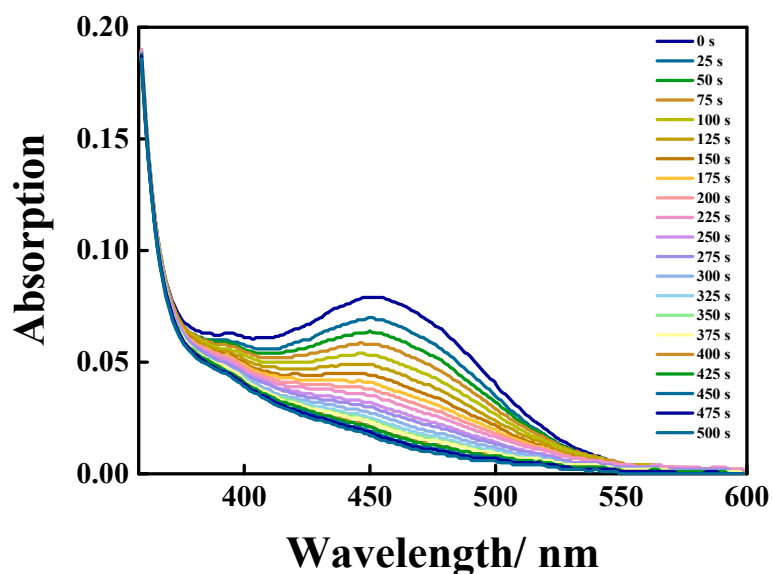

**Figure S6** Time-dependent UV-vis absorption spectra of 3ThDpF during the photochromic bleaching process (in degassed THF solution, with concentration of  $1.0 \times 10^{-3}$  M).

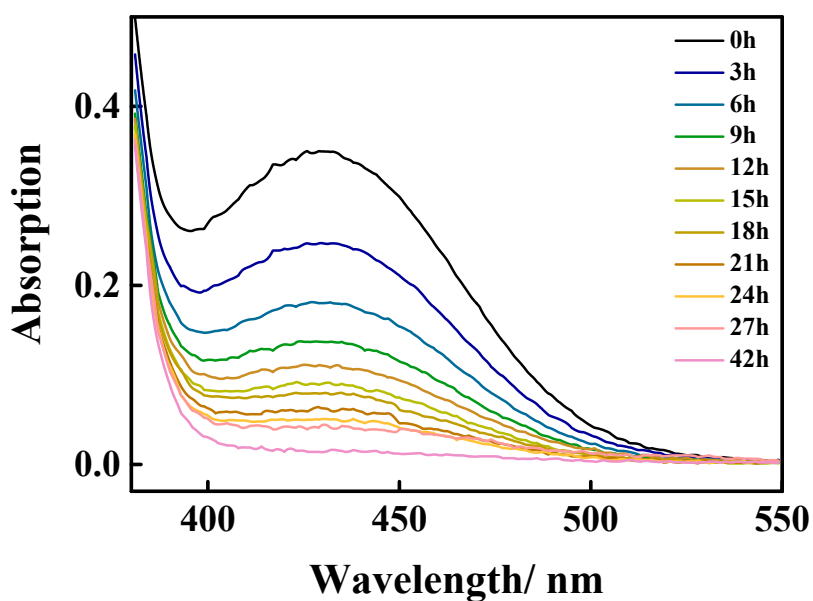

**Figure S7** Time-dependent UV-vis absorption spectra of ring-closure state of 2ThDpF in dark at 303 K (in degassed THF solution, with concentration of  $1.0 \times 10^{-3}$  M).

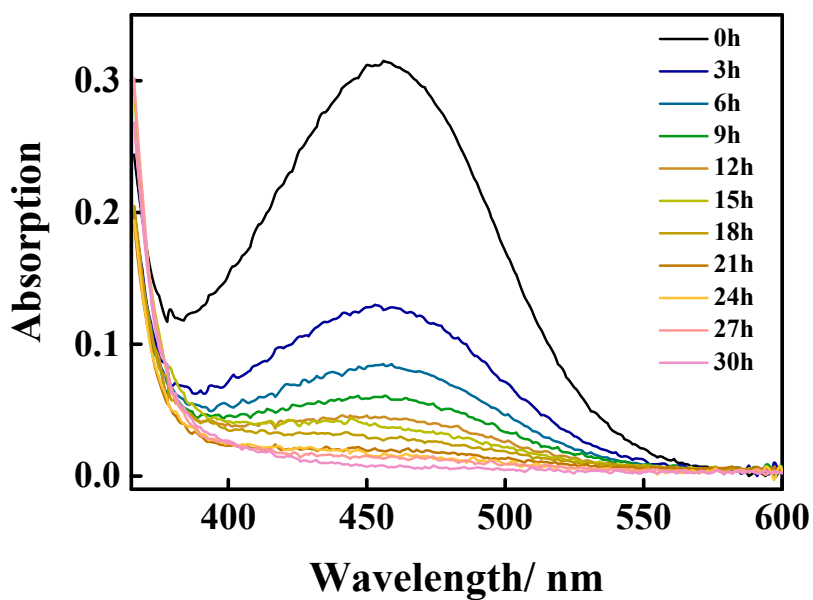

**Figure S8** Time-dependent UV-vis absorption spectra of ring-closure state of 3ThDpF in dark at 303 K (in degassed THF solution, with concentration of  $1.0 \times 10^{-3}$  M).

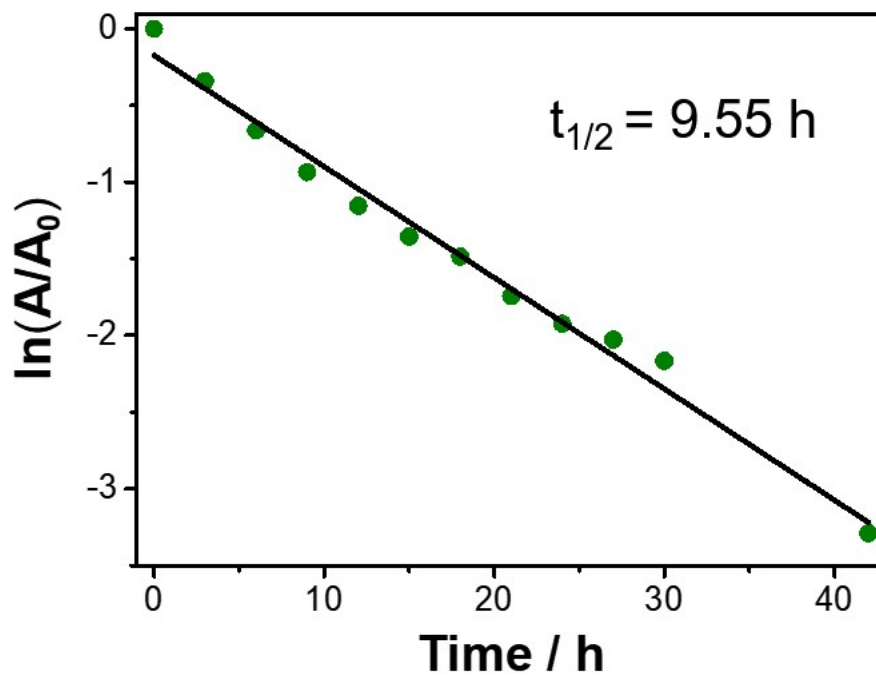

**Figure S9** Plot of  $\ln(A/A_0)$  versus time for the absorbance decay of 2ThDpF at 430 nm at 303 K in degassed in degassed  $\text{CH}_2\text{Cl}_2$  solution with concentration of  $1.0 \times 10^{-3}$  M; solid lines represent the theoretical linear fits.

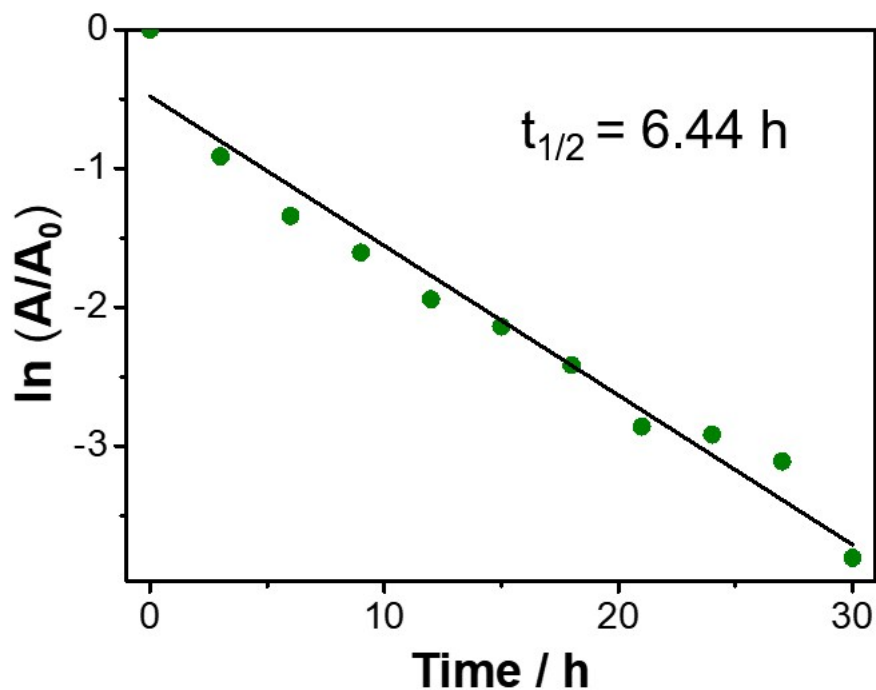

**Figure S10** Plot of  $\ln(A/A_0)$  versus time for the absorbance decay of 3ThDpF at 457 nm at 303 K in degassed in degassed  $\text{CH}_2\text{Cl}_2$  solution with concentration of  $1.0 \times 10^{-3}$



M; solid lines represent the theoretical linear fits.

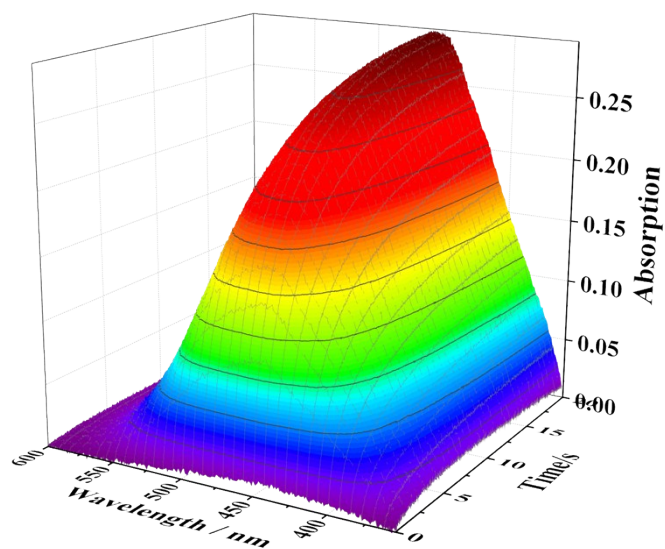

**Figure S11** Time dependent UV-vis reflectance spectra of compound 3ThDpF in solid state during the photochromic process.

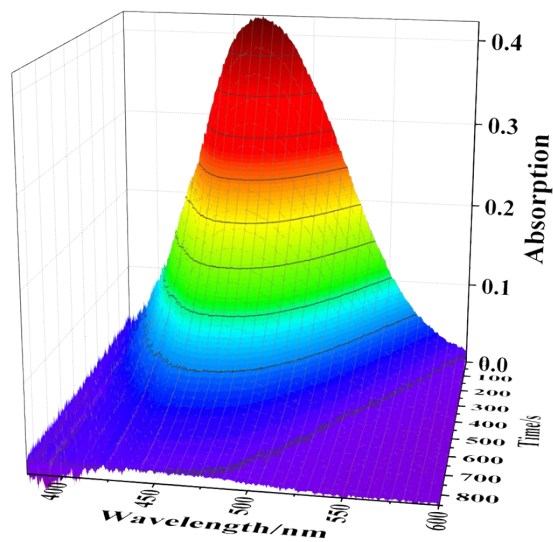

**Figure S12** Time dependent UV-vis reflectance spectra of compound 3ThDpF in solid state during the photochromic bleaching process.

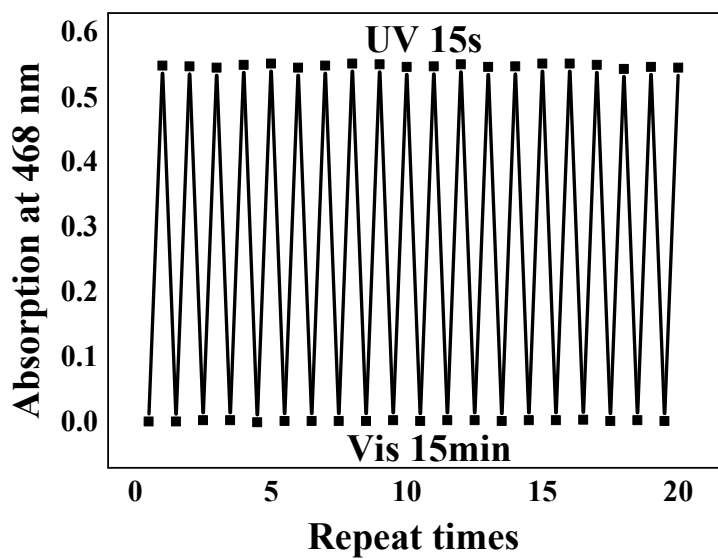

**Figure S13** Recycling of the photochromic process of compound 3ThDpF in solid state as a function of exposure to UV-light (365 nm) and white-light for 15 seconds and 15 minutes, respectively.

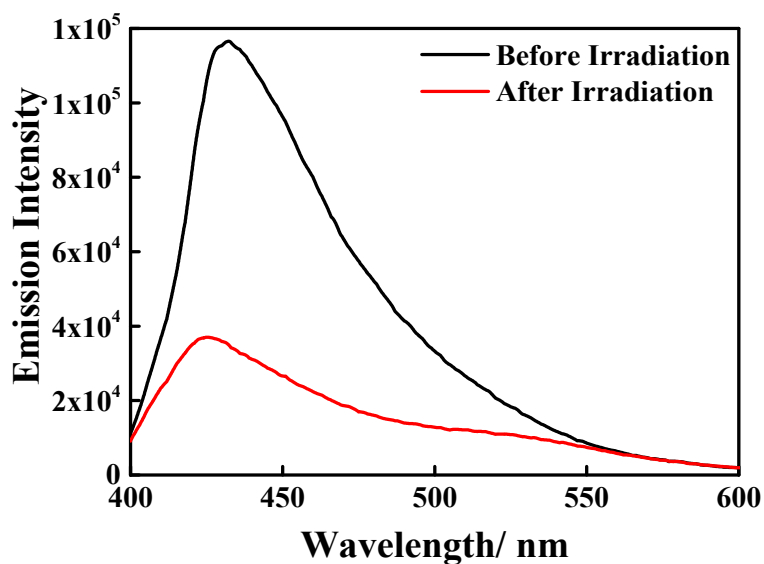

**Figure S14** The emission spectra for 2ThDpF in solid state before and after UV-light irradiation.

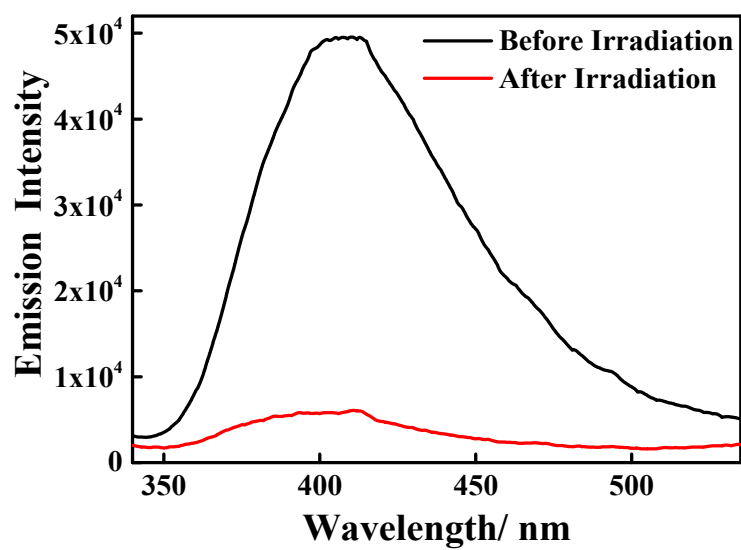

**Figure S15** The emission spectra for 3ThDpF in solid state before and after UV-light irradiation.

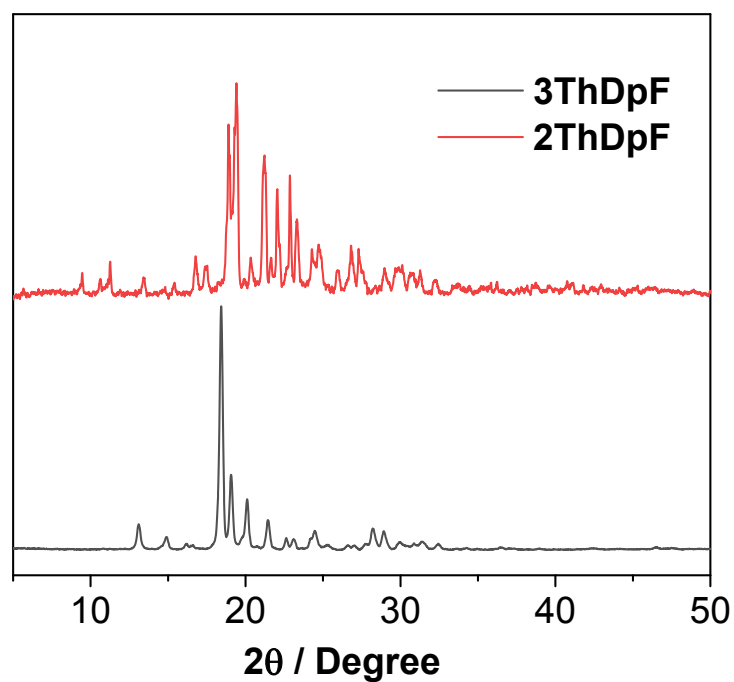

**Figure S16** pXRD spectra of 2ThDpF and 3ThDpF powders.

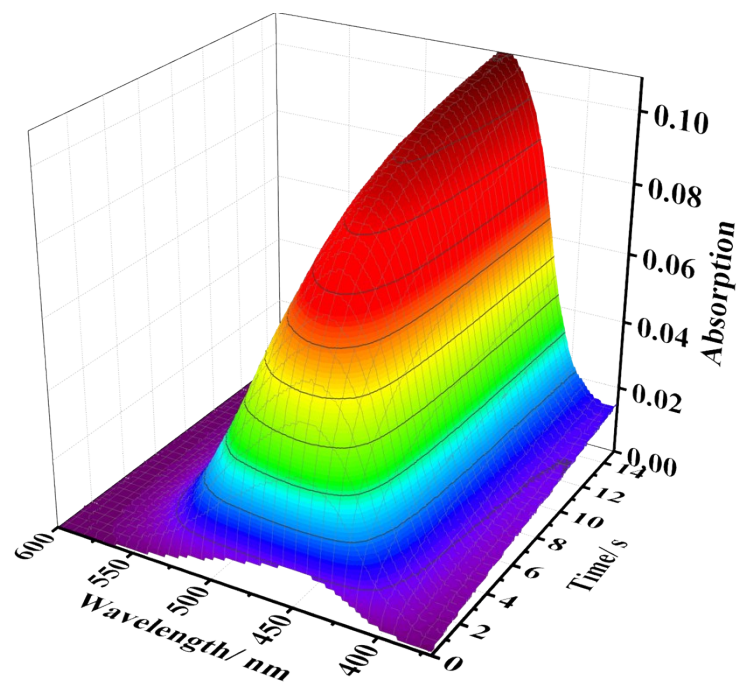

**Figure S17** Time dependent UV-vis reflectance spectra of 2ThDpF in single-crystal state during the photochromic process.

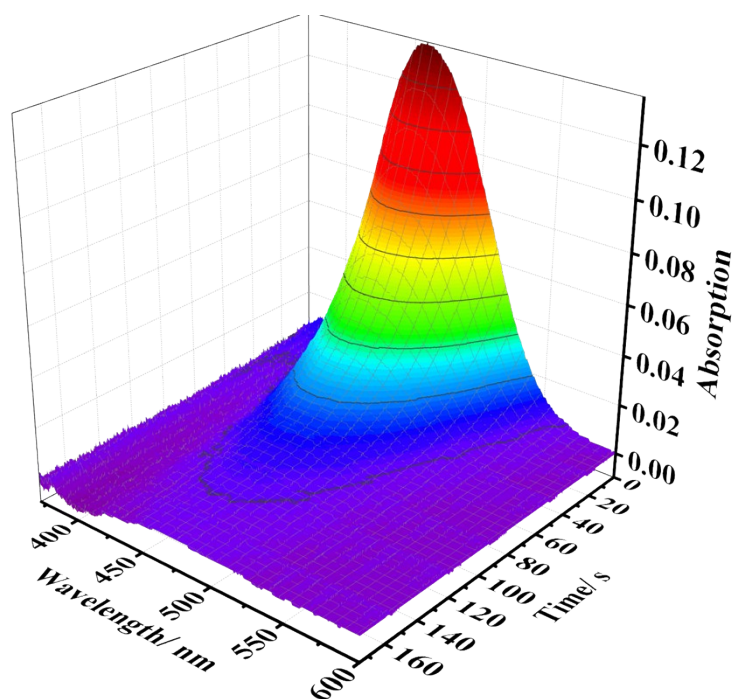

**Figure S18** Time dependent UV-vis reflectance spectra of 2ThDpF in single-crystal state during the photochromic bleaching process.

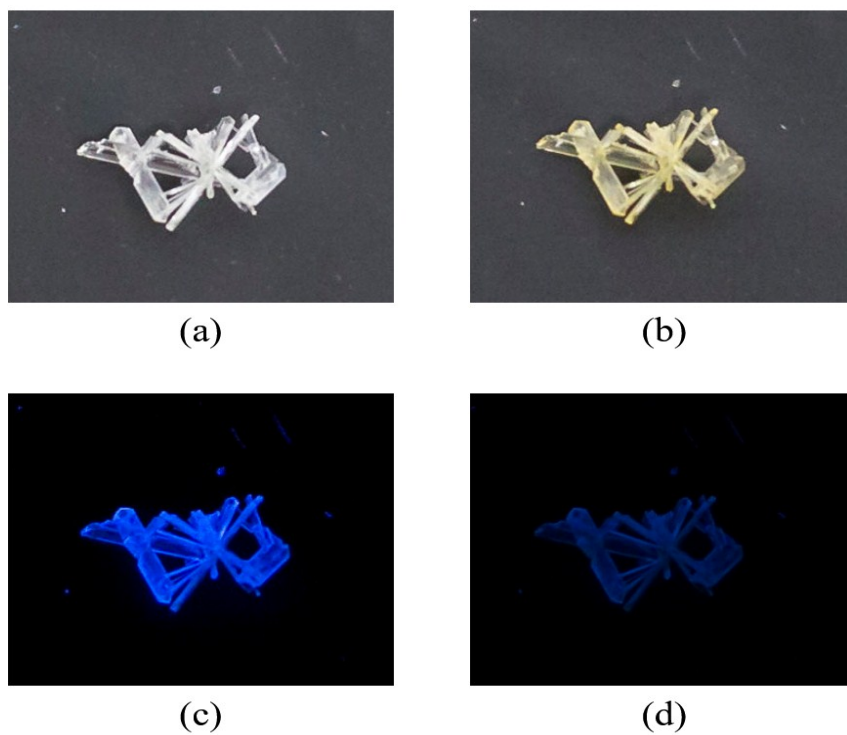

**Figure S19** Photos of 2ThDpF: (a) Before UV-irradiated observed under daylight; (b) After UV-irradiated observed under daylight; (c) Before UV-irradiated observed under Uv-light; (d) After UV-irradiated observed under Uv-light.

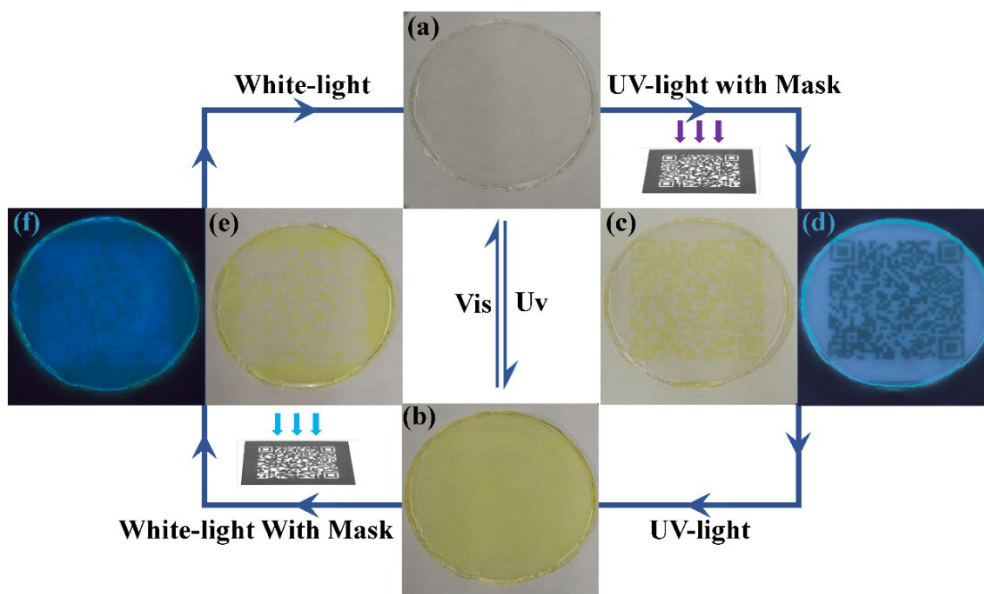

**Figure S20** Illustration of the photopatterning processes for polymer films containing 2ThDpF: (a) Before UV-irradiated; (b) After UV-irradiated; (c) After UV-irradiated with mask (observed under daylight); (d) After UV-irradiated with mask (observed under UV-light); (e) The UV-irradiated film further irradiated with white-light with mask (observed under daylight); (f) The UV-irradiated film further irradiated with white-light with mask (observed under UV-light).

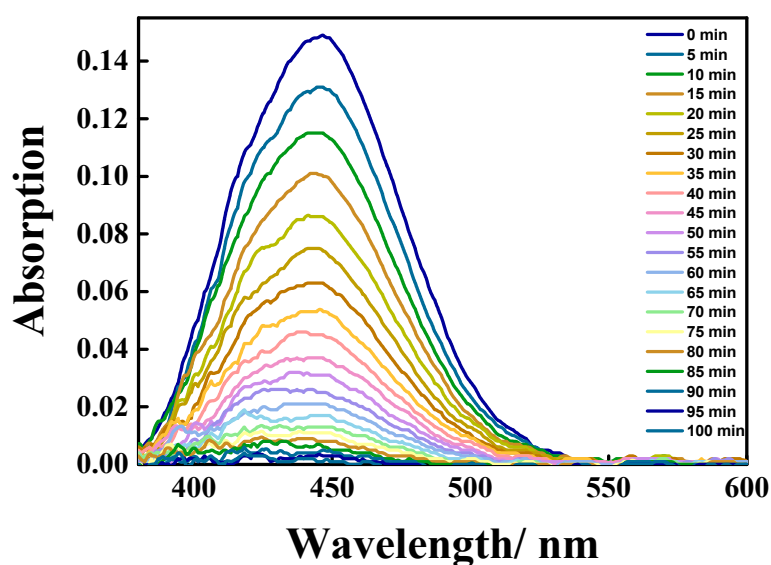

**Figure S21** Time dependent UV-vis reflectance spectra of polymer films containing 5 wt% 2ThDpF during the photochromic bleaching process.

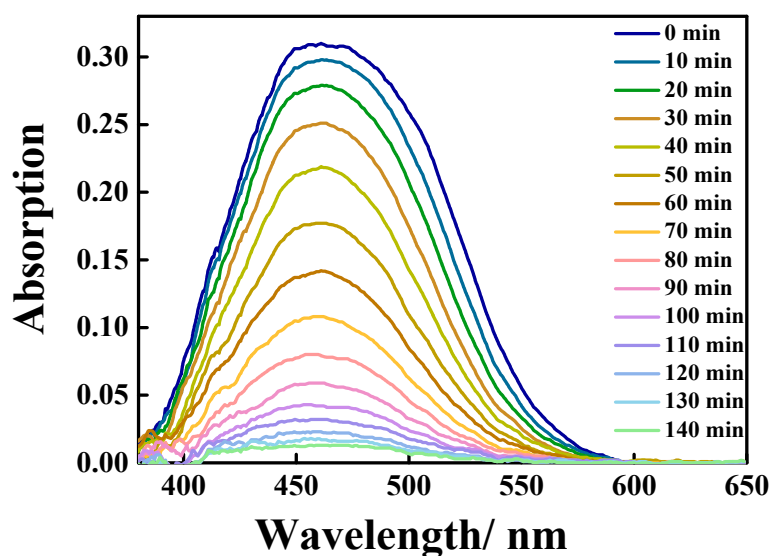

**Figure S22** Time dependent UV-vis reflectance spectra of polymer films containing 5 wt% 3ThDpF during the photochromic bleaching process.

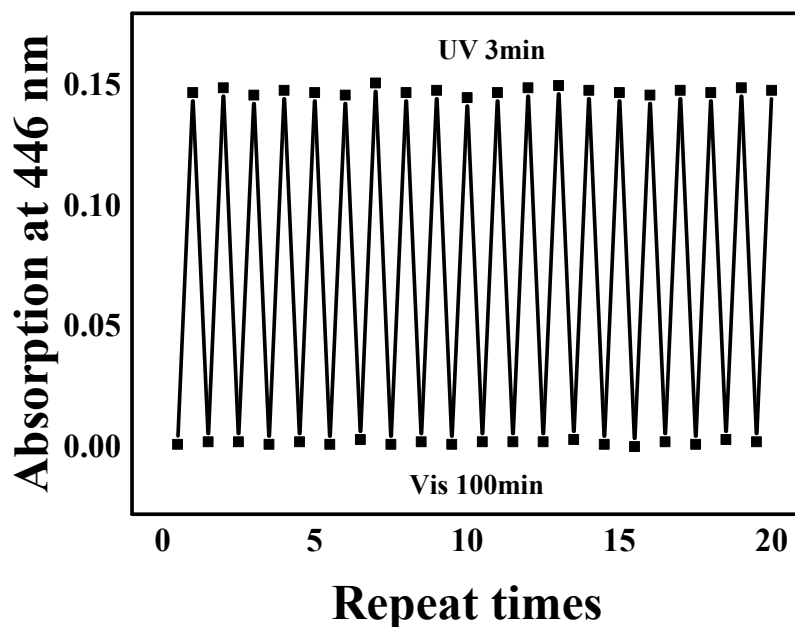

**Figure S23** Recycling of the photochromic process of polymer films containing 5 wt% 2ThDpF as a function of exposure to UV-light (365 nm) and white-light for 3 minutes and 100 minutes, respectively.

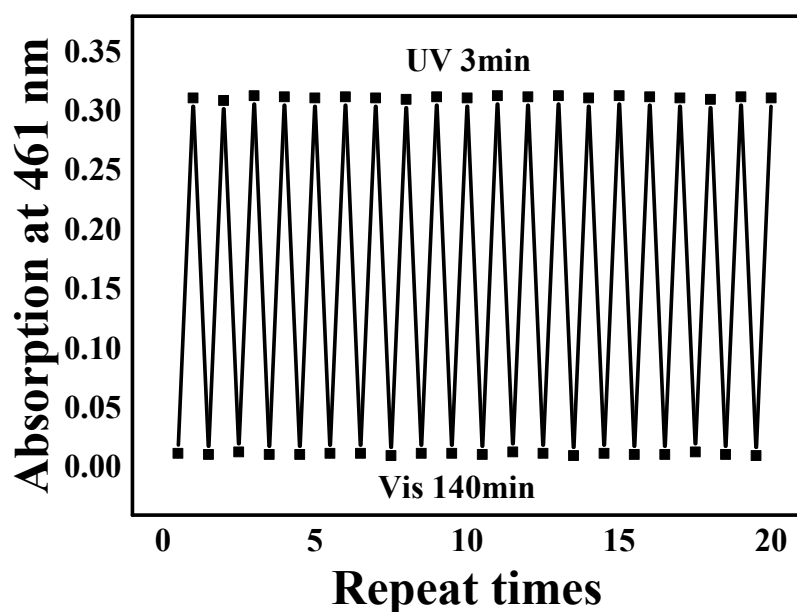

**Figure S24** Recycling of the photochromic process of polymer films containing 5 wt% 3ThDpF as a function of exposure to UV-light (365 nm) and white-light for 3 minutes and 140 minutes, respectively.

#### 4 Demonstration of the photochromic mechanism

##### (1) 2ThDpF

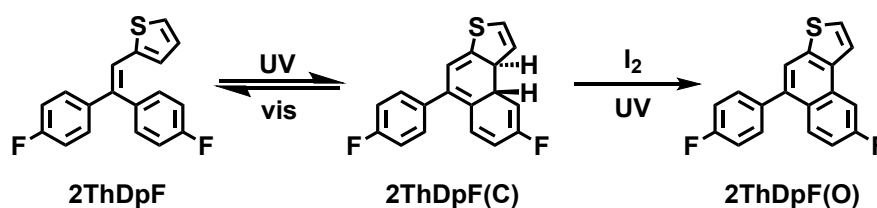

**Photochemical reaction procedure of 2ThDpF:** A mixture of 2-(2,2-bis(4-fluorophenyl)vinyl)thiophene (30.0 mg, 0.1 mmol) and iodine (51.0 mg, 0.4 mmol) in degassed cyclohexane (5 ml) was irradiated with UV-light in a photochemical reactor (Rayonet RPR200) for 12 h. The mixture was dissolved in 20 ml dichloromethane and washed with Na<sub>2</sub>SO<sub>3</sub> aqueous solution for 3 times. The mixture was further purified by column chromatography with hexane as eluent. A white solid named 2ThDpF(O) was obtained. Yield: 26.1 mg (86.6 %).



**Characterization of 2ThDpF(O):**  $^1\text{H}$  NMR (500 MHz, deuterated DMSO, 298 K):  $\delta =$  8.43 (dd, 10.6 Hz, 2.7 Hz, 1H), 8.28 (d, 5.0 Hz, 1H), 7.97 (s, 1H), 7.95 (d, 5.4 Hz, 1H), 7.82 (dd, 9.2 Hz, 5.8 Hz, 1H), 7.53–7.56 (m, 2H), 7.40–7.44 (m, 1H), 7.35–7.39 (m, 2H); High resolution EI-MS:  $m/z$  found: 296.0467  $[\text{M}]^+$ ; calcd for  $\text{C}_{18}\text{H}_{10}\text{F}_2\text{S}$ : 296.0471. Elemental analyses (%) calcd for  $\text{C}_{18}\text{H}_{10}\text{F}_2\text{S}$ : C 72.96, H 3.40; found: C 72.65, H 3.60.

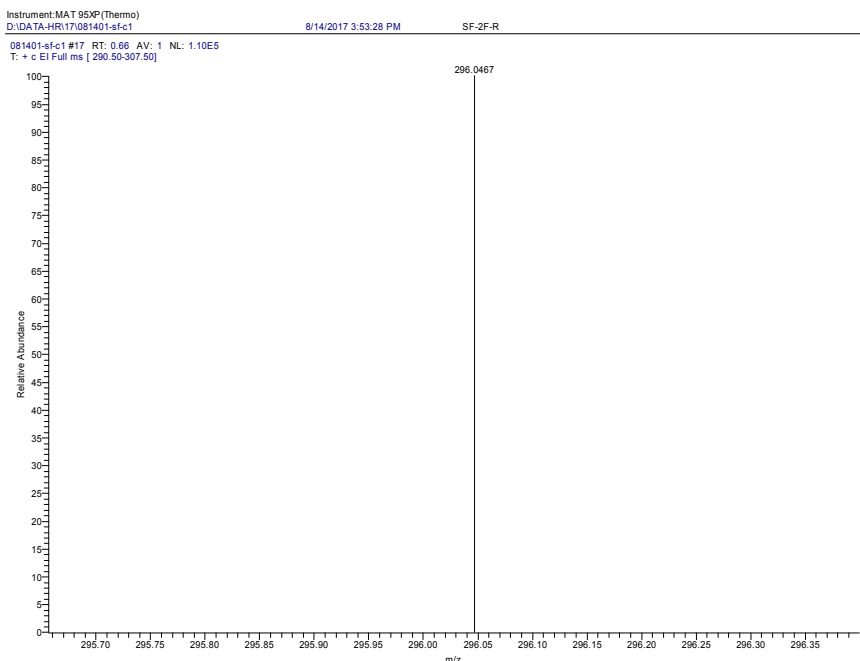

**Figure S25** High Resolution EI mass spectrum of compound 2ThDpF(O).

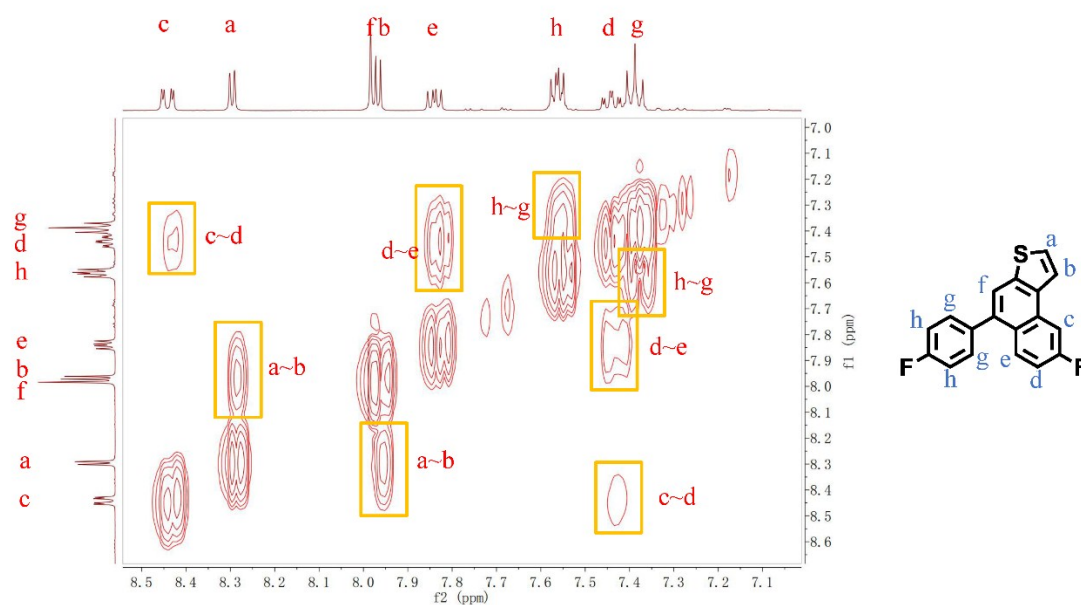

**Figure S26.**  $^1\text{H}$ - $^1\text{H}$  COSY NMR spectrum of 2ThDpF(O) in deuterated DMSO solution.

(2) 3ThDpF

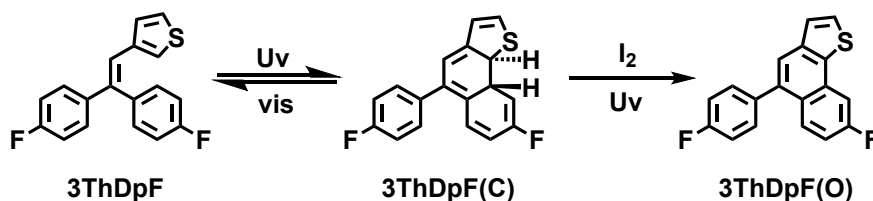

**Photochemical reaction procedure of 3ThDpF:** This compound was prepared according to the aforementioned procedure for 2ThDpF(O) except that 3-(2,2-bis(4-fluorophenyl)vinyl)thiophene (30.0 mg, 0.1 mmol) were used in place of 2-(2,2-bis(4-fluorophenyl)vinyl)thiophene (30.0 mg, 0.1 mmol). A white solid named 2ThDpF(O) was obtained. Yield: 25.7 mg (85.3 %).

**Charactrization of 3ThDpF(O):**  $^1\text{H}$  NMR (500 MHz, deuterated DMSO, 298 K):  $\delta$  = 7.99 (dd, 9.9 Hz, 2.6 Hz, 1H), 7.96 (d, 5.3 Hz, 1H), 7.83–7.86 (m, 2H), 7.64 (d, 5.3 Hz, 1H), 7.54–7.57 (m, 2H), 7.43–7.46 (m, 1H), 7.37–7.41 (m, 2H); High solution EI–MS:  $m/z$  found: 296.0464  $[\text{M}]^+$ ; calcd for  $\text{C}_{18}\text{H}_{10}\text{F}_2\text{S}$ : 296.0471. Elemental analyses (%) calcd for  $\text{C}_{18}\text{H}_{10}\text{F}_2\text{S}$ : C 72.96, H 3.40; found: C 72.77, H 3.51.

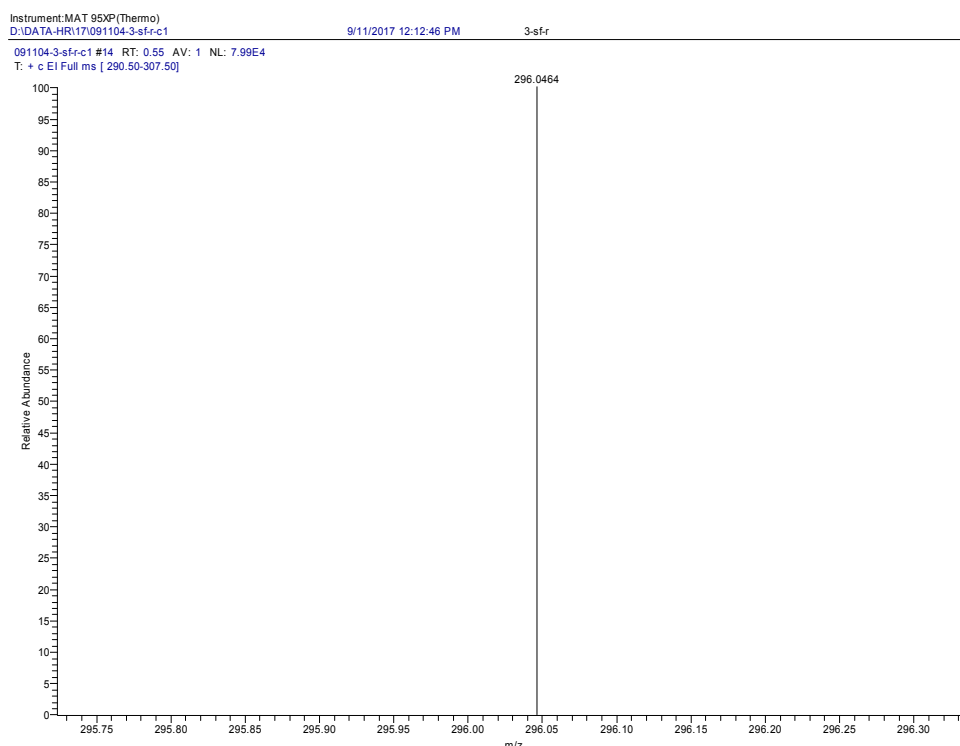

**Figure S27** High Resolution EI mass spectrum of compound 3ThDpF(O).

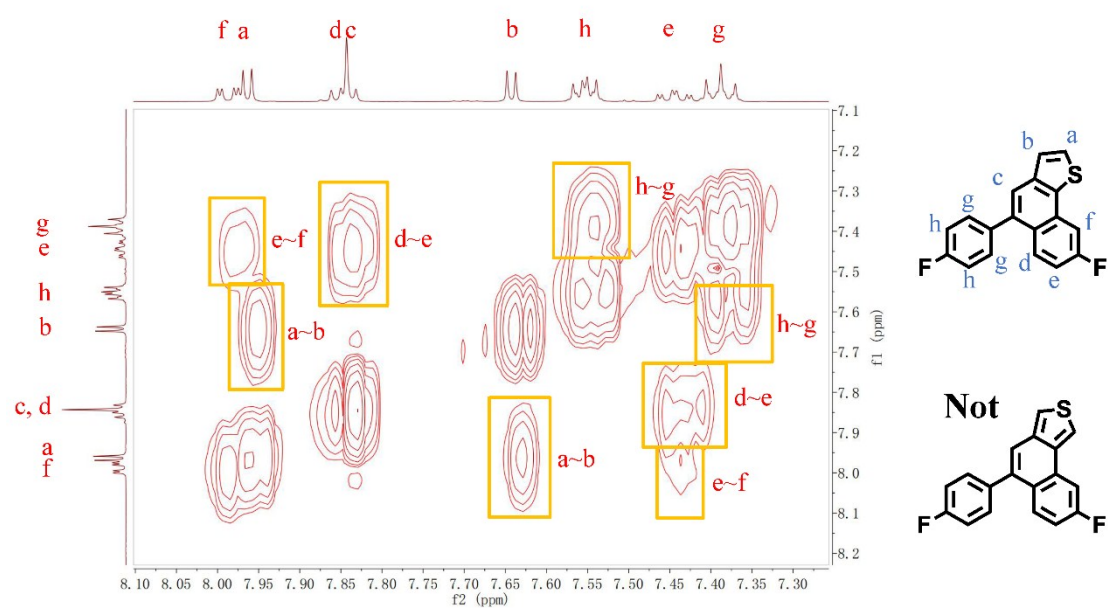

**Figure S28.**  $^1\text{H}$ - $^1\text{H}$  COSY NMR spectrum of 3ThDpF(O) in deuterated DMSO solution.

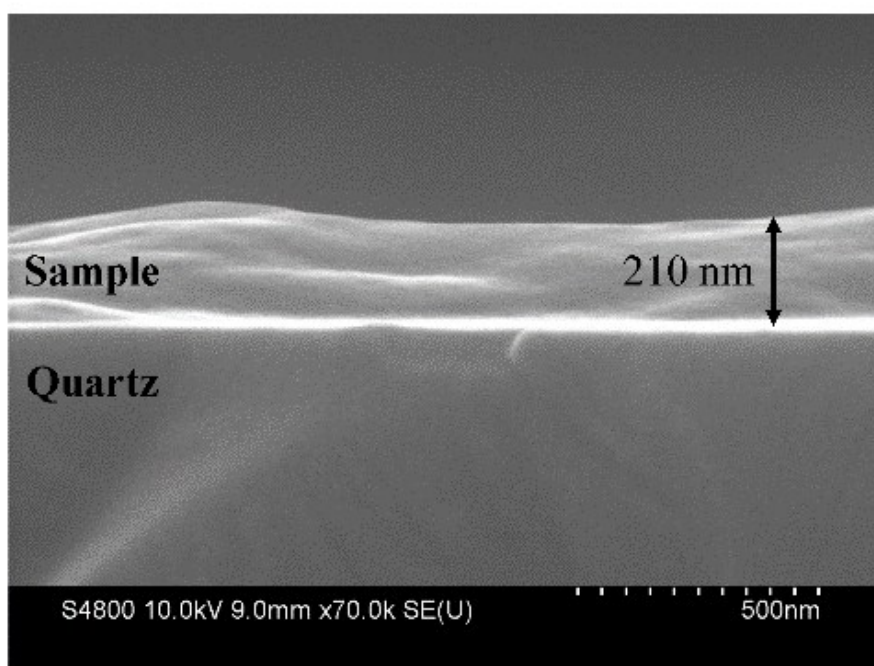

**Figure S29** SEM image for the cross sections of surface-2ThDpF.

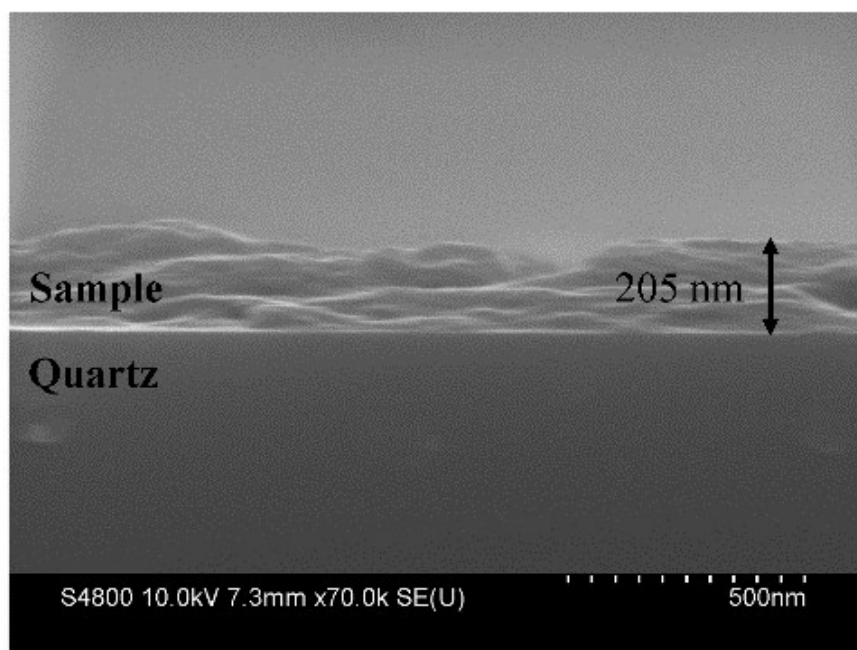

**Figure S30** SEM image for the cross sections of surface-3ThDpF.

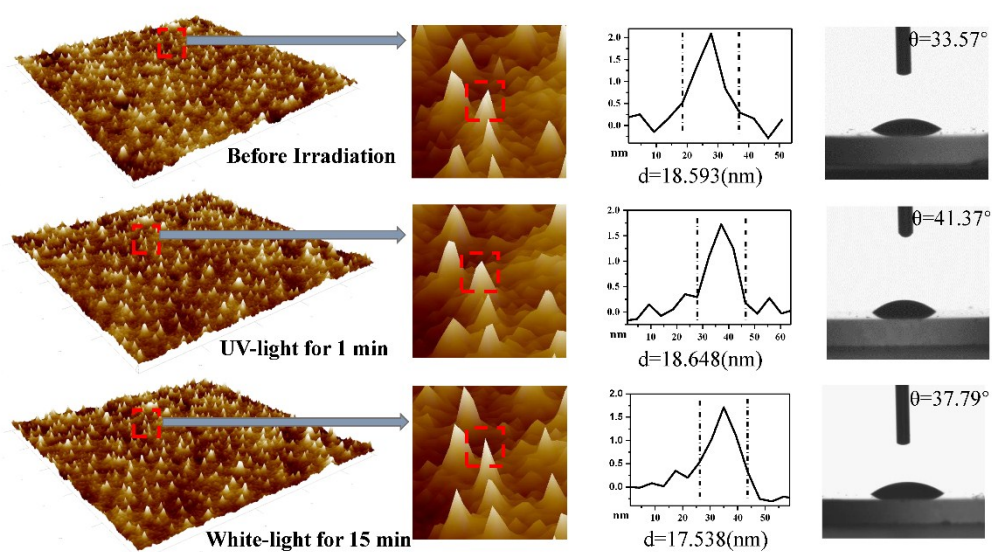

**Figure S31** AFM images and contact angles for the surface-3ThDpF before, after UV-light irradiation (1 minute) and further white-light irradiation for 15 minutes.

## 5. Single crystal data of 2ThDpF

Single-crystal X-ray analyses for **2ThDpF** were performed on an Oxford Diffraction Gemini S Ultra X-ray single-crystal diffractometer with graphite-monochromatized Cu-K $\alpha$  radiation ( $\lambda = 1.54184 \text{ \AA}$ ). The structure was solved with Olex2 v1.2 program

and expanded using Fourier techniques. Non-H atoms of this compound was further refined with anisotropic thermal parameters. The hydrogen atoms were added in idealized positions and refined with fixed geometry according to their carrier atoms.

Crystal data for **2ThDpF**; C<sub>18</sub>H<sub>12</sub>F<sub>2</sub>S, Formula Weight = 298.84 g/mol, orthorhombic, space group Pbca, T = 293 K, Z = 16, a = 9.2899(3) Å, b = 19.4917(7) Å, c = 31.1683(11) Å,  $\alpha = 90^\circ$ ,  $\beta = 90^\circ$ ,  $\gamma = 90^\circ$ , V = 5643.8(3) Å<sup>3</sup>,  $\rho_c = 1.407 \text{ g cm}^{-3}$ ,  $\mu(\text{CuK}\alpha) = 2.152 \text{ mm}^{-1}$ , F(000) = 2472. Reflections collected 13309, Independent reflections 5534 ( $R_{\text{int}}$

**Table S1.** Bond distances (Å) for **2ThDpF**

| Atom | Atom | Length/Å | Atom | Atom | Length/Å |
|------|------|----------|------|------|----------|
| S2   | C22  | 1.726(3) | C26  | C27  | 1.382(5) |
| S2   | C19  | 1.718(4) | C6   | C13  | 1.490(5) |
| S1   | C4   | 1.729(4) | C6   | C5   | 1.347(5) |
| S1   | C1   | 1.703(4) | C13  | C14  | 1.415(5) |
| F4   | C28  | 1.360(4) | C13  | C18  | 1.396(5) |
| F3   | C34  | 1.361(4) | C30  | C29  | 1.381(5) |
| F2   | C16  | 1.355(4) | C27  | C28  | 1.372(5) |
| F1   | C10  | 1.361(4) | C28  | C29  | 1.380(5) |
| C3   | C4   | 1.427(5) | C36  | C35  | 1.391(5) |
| C3   | C2   | 1.439(5) | C14  | C15  | 1.379(5) |
| C23  | C24  | 1.362(5) | C12  | C11  | 1.391(5) |
| C23  | C22  | 1.441(5) | C21  | C20  | 1.416(5) |
| C24  | C31  | 1.482(4) | C33  | C34  | 1.362(6) |
| C24  | C25  | 1.488(5) | C4   | C5   | 1.446(5) |
| C31  | C32  | 1.395(5) | C34  | C35  | 1.378(6) |
| C31  | C36  | 1.397(5) | C16  | C15  | 1.368(6) |

|     |     |          |     |     |          |
|-----|-----|----------|-----|-----|----------|
| C25 | C26 | 1.398(5) | C16 | C17 | 1.375(5) |
| C25 | C30 | 1.389(5) | C10 | C11 | 1.392(6) |
| C32 | C33 | 1.397(5) | C10 | C9  | 1.345(6) |
| C22 | C21 | 1.390(5) | C19 | C20 | 1.350(6) |
| C7  | C6  | 1.501(5) | C2  | C1  | 1.351(5) |
| C7  | C12 | 1.393(5) | C8  | C9  | 1.391(5) |
| C7  | C8  | 1.385(5) | C17 | C18 | 1.389(6) |

**Table S2.** Bond Angles (°) for **2ThDpF**

| Atom | Atom | Atom | Angle/°   | Atom | Atom | Atom | Angle/°  |
|------|------|------|-----------|------|------|------|----------|
| C19  | S2   | C22  | 92.43(18) | C27  | C28  | C29  | 122.9(3) |
| C1   | S1   | C4   | 92.54(18) | C35  | C36  | C31  | 120.9(3) |
| C4   | C3   | C2   | 110.0(3)  | C15  | C14  | C13  | 120.7(4) |
| C24  | C23  | C22  | 129.1(3)  | C11  | C12  | C7   | 120.2(4) |
| C23  | C24  | C31  | 119.7(3)  | C22  | C21  | C20  | 113.5(3) |
| C23  | C24  | C25  | 122.4(3)  | C34  | C33  | C32  | 118.4(4) |
| C31  | C24  | C25  | 118.0(3)  | C28  | C29  | C30  | 118.4(3) |
| C32  | C31  | C24  | 121.9(3)  | C3   | C4   | S1   | 110.8(3) |
| C32  | C31  | C36  | 118.2(3)  | C3   | C4   | C5   | 122.3(3) |
| C36  | C31  | C24  | 119.9(3)  | C5   | C4   | S1   | 126.7(3) |
| C26  | C25  | C24  | 119.2(3)  | F3   | C34  | C33  | 119.0(4) |
| C30  | C25  | C24  | 121.5(3)  | F3   | C34  | C35  | 118.3(4) |
| C30  | C25  | C26  | 119.3(3)  | C33  | C34  | C35  | 122.7(3) |
| C31  | C32  | C33  | 121.2(4)  | C6   | C5   | C4   | 130.2(3) |
| C23  | C22  | S2   | 127.3(3)  | F2   | C16  | C15  | 119.1(3) |
| C21  | C22  | S2   | 109.5(2)  | F2   | C16  | C17  | 118.7(4) |
| C21  | C22  | C23  | 123.1(3)  | C15  | C16  | C17  | 122.3(4) |
| C12  | C7   | C6   | 120.1(3)  | C34  | C35  | C36  | 118.6(4) |

|     |     |     |          |     |     |     |          |
|-----|-----|-----|----------|-----|-----|-----|----------|
| C8  | C7  | C6  | 120.1(3) | F1  | C10 | C11 | 117.2(4) |
| C8  | C7  | C12 | 119.7(3) | C9  | C10 | F1  | 120.1(4) |
| C27 | C26 | C25 | 120.7(3) | C9  | C10 | C11 | 122.7(3) |
| C13 | C6  | C7  | 116.8(3) | C20 | C19 | S2  | 112.1(3) |
| C5  | C6  | C7  | 121.5(3) | C1  | C2  | C3  | 114.1(3) |
| C5  | C6  | C13 | 121.6(3) | C16 | C15 | C14 | 119.4(3) |
| C14 | C13 | C6  | 120.2(3) | C7  | C8  | C9  | 120.1(4) |
| C18 | C13 | C6  | 122.1(3) | C12 | C11 | C10 | 117.9(4) |
| C18 | C13 | C14 | 117.8(3) | C19 | C20 | C21 | 112.5(4) |
| C29 | C30 | C25 | 120.6(3) | C10 | C9  | C8  | 119.4(4) |
| C28 | C27 | C26 | 118.2(3) | C2  | C1  | S1  | 112.5(3) |
| F4  | C28 | C27 | 118.2(3) | C16 | C17 | C18 | 118.5(4) |
| F4  | C28 | C29 | 118.9(3) | C17 | C18 | C13 | 121.4(3) |

## 6 Computational Details

Calculations were carried out using Gaussian 09 software package. Geometry optimizations were performed for **2ThDpF** and **3ThDpF** in both open forms and closed form using density functional theory (DFT) at B3LYP/6-31G\* level. On the basis of the ground state optimized geometries in the gas phase, the time-dependent density functional theory (TDDFT) method at the same level was employed to compute the low-energy singlet–singlet transitions for the complexes.

**Table S3.** Bond angles and Bond distances (Å) for **2ThDpF**

| Tag | Symbol | NA | NB | NC | Bond     | Angle    | Dihedral | X        | Y        | Z        |
|-----|--------|----|----|----|----------|----------|----------|----------|----------|----------|
| 1   | C      |    |    |    |          |          |          | 1.723321 | -1.95978 | 0.132812 |
| 2   | C      | 1  |    |    | 1.448767 |          |          | 0.310109 | -1.64871 | 0.203516 |
| 3   | C      | 2  | 1  |    | 1.358996 | 131.8624 |          | -0.36699 | -0.47567 | 0.092326 |
| 4   | C      | 3  | 2  | 1  | 1.48584  | 119.9222 | 172.7396 | -1.85218 | -0.47844 | 0.048429 |

|    |   |    |    |    |          |          |          |          |          |          |
|----|---|----|----|----|----------|----------|----------|----------|----------|----------|
| 5  | C | 3  | 2  | 1  | 1.493414 | 123.1905 | -8.48409 | 0.307625 | 0.855494 | 0.035789 |
| 6  | C | 5  | 3  | 2  | 1.404421 | 120.7899 | -65.1531 | 1.031341 | 1.342018 | 1.136665 |
| 7  | C | 6  | 5  | 3  | 1.394258 | 121.1713 | -178.225 | 1.633483 | 2.599171 | 1.105878 |
| 8  | C | 7  | 6  | 5  | 1.389391 | 118.6228 | -0.10888 | 1.506968 | 3.369789 | -0.04327 |
| 9  | C | 8  | 7  | 6  | 1.390748 | 121.9969 | 0.518122 | 0.792075 | 2.928391 | -1.15155 |
| 10 | C | 9  | 8  | 7  | 1.393045 | 118.6308 | -0.02994 | 0.188077 | 1.674155 | -1.10004 |
| 11 | C | 4  | 3  | 2  | 1.408228 | 120.7679 | 147.7888 | -2.59091 | 0.590836 | 0.590678 |
| 12 | C | 11 | 4  | 3  | 1.392329 | 121.5054 | -178.579 | -3.98322 | 0.59054  | 0.584034 |
| 13 | C | 12 | 11 | 4  | 1.389786 | 118.8055 | -0.51701 | -4.64995 | -0.48929 | 0.017506 |
| 14 | C | 13 | 12 | 11 | 1.390062 | 121.7    | -0.41899 | -3.96267 | -1.55781 | -0.54657 |
| 15 | C | 14 | 13 | 12 | 1.392231 | 118.7745 | 0.351865 | -2.5706  | -1.54139 | -0.53305 |
| 16 | F | 13 | 12 | 11 | 1.34966  | 119.1776 | -179.673 | -5.9995  | -0.49424 | 0.001035 |
| 17 | F | 8  | 7  | 6  | 1.349317 | 119.0335 | -179.881 | 2.088442 | 4.58674  | -0.08296 |
| 18 | S | 1  | 2  | 3  | 1.759003 | 126.4491 | -8.05636 | 3.014124 | -0.85769 | -0.32906 |
| 19 | C | 18 | 1  | 2  | 1.733888 | 91.83231 | -176.313 | 4.202646 | -2.11539 | -0.21965 |
| 20 | C | 19 | 18 | 1  | 1.368515 | 111.986  | -0.22252 | 3.650724 | -3.31083 | 0.153366 |
| 21 | C | 1  | 2  | 3  | 1.383495 | 123.8716 | 176.1337 | 2.246636 | -3.22233 | 0.347652 |
| 22 | H | 2  | 1  | 21 | 1.088543 | 111.7109 | -5.31856 | -0.29207 | -2.54309 | 0.353151 |
| 23 | H | 6  | 5  | 3  | 1.085351 | 119.2423 | 1.70013  | 1.12074  | 0.726666 | 2.026235 |
| 24 | H | 7  | 6  | 5  | 1.084457 | 121.683  | 179.8078 | 2.191578 | 2.98428  | 1.952204 |
| 25 | H | 9  | 8  | 7  | 1.084483 | 119.6488 | 179.7803 | 0.714807 | 3.562911 | -2.02763 |
| 26 | H | 10 | 9  | 8  | 1.08562  | 119.4945 | 179.4399 | -0.38106 | 1.319518 | -1.95379 |
| 27 | H | 11 | 4  | 3  | 1.084667 | 119.363  | 0.561597 | -2.06527 | 1.428367 | 1.036483 |
| 28 | H | 12 | 11 | 4  | 1.084587 | 121.5507 | 179.3202 | -4.55296 | 1.408628 | 1.011193 |
| 29 | H | 14 | 13 | 12 | 1.084608 | 119.6393 | -178.431 | -4.51662 | -2.37128 | -1.00239 |
| 30 | H | 15 | 14 | 13 | 1.085082 | 118.9804 | -177.576 | -2.03061 | -2.35422 | -1.00753 |
| 31 | H | 19 | 18 | 1  | 1.081348 | 119.6961 | -179.654 | 5.239752 | -1.89207 | -0.42905 |
| 32 | H | 20 | 19 | 18 | 1.083831 | 123.5911 | -179.693 | 4.224031 | -4.22136 | 0.283542 |
| 33 | H | 21 | 1  | 2  | 1.084719 | 121.9901 | -2.94665 | 1.622304 | -4.0623  | 0.632742 |

---



**Table S4.** Bond angles and Bond distances (Å) for **2ThDpF(C)**

| Tag | Symbol | NA | NB | NC | Bond     | Angle    | Dihedral | X        | Y        | Z        |
|-----|--------|----|----|----|----------|----------|----------|----------|----------|----------|
| 1   | C      |    |    |    |          |          |          | -1.44047 | -1.78184 | 0.003935 |
| 2   | C      | 1  |    |    | 1.348696 |          |          | -0.1192  | -1.61035 | 0.213266 |
| 3   | C      | 2  | 1  |    | 1.460358 | 120.5217 |          | 0.481368 | -0.28294 | 0.113576 |
| 4   | C      | 3  | 2  | 1  | 1.487647 | 116.4021 | -166.596 | 1.966924 | -0.2318  | 0.053572 |
| 5   | C      | 3  | 2  | 1  | 1.377651 | 119.5153 | 14.65594 | -0.33008 | 0.830354 | 0.106732 |
| 6   | C      | 5  | 3  | 2  | 1.543789 | 118.2068 | 7.391215 | -1.83714 | 0.636523 | 0.379656 |
| 7   | C      | 6  | 5  | 3  | 1.509778 | 114.0999 | -169.157 | -2.6768  | 1.859443 | 0.098813 |
| 8   | C      | 7  | 6  | 5  | 1.338002 | 120.6383 | -12.1365 | -2.10061 | 3.048575 | -0.11148 |
| 9   | C      | 8  | 7  | 6  | 1.445549 | 123.6261 | 5.365903 | -0.67063 | 3.240739 | -0.20006 |
| 10  | C      | 9  | 8  | 7  | 1.356911 | 119.7488 | 1.963281 | 0.159468 | 2.171409 | -0.1069  |
| 11  | C      | 4  | 3  | 2  | 1.40624  | 121.908  | -127.294 | 2.719058 | 0.570104 | 0.930357 |
| 12  | C      | 11 | 4  | 3  | 1.393744 | 121.3517 | 178.1784 | 4.112138 | 0.580691 | 0.888687 |
| 13  | C      | 12 | 11 | 4  | 1.389624 | 118.7459 | -0.39848 | 4.759211 | -0.22848 | -0.03738 |
| 14  | C      | 13 | 12 | 11 | 1.390062 | 121.814  | -0.35126 | 4.055725 | -1.04808 | -0.91239 |
| 15  | C      | 14 | 13 | 12 | 1.393019 | 118.6772 | 0.265856 | 2.663857 | -1.04758 | -0.85578 |
| 16  | F      | 13 | 12 | 11 | 1.34936  | 119.0972 | -179.921 | 6.107802 | -0.22497 | -0.08279 |
| 17  | F      | 8  | 7  | 6  | 1.353486 | 120.7939 | -176.93  | -2.85154 | 4.158356 | -0.3023  |
| 18  | S      | 1  | 2  | 3  | 1.771062 | 126.9681 | -178.147 | -2.35016 | -3.29663 | 0.124624 |
| 19  | C      | 18 | 1  | 2  | 1.7826   | 90.3099  | 166.2456 | -3.88377 | -2.38807 | 0.109949 |
| 20  | C      | 19 | 18 | 1  | 1.335538 | 114.794  | 5.524811 | -3.75459 | -1.07444 | -0.09341 |
| 21  | C      | 20 | 19 | 18 | 1.510426 | 114.7373 | 3.542739 | -2.3412  | -0.61167 | -0.35716 |
| 22  | H      | 6  | 5  | 3  | 1.110083 | 106.1022 | 72.49583 | -1.92708 | 0.407887 | 1.46221  |
| 23  | H      | 21 | 20 | 19 | 1.109725 | 107.9643 | 103.3233 | -2.24139 | -0.41974 | -1.44559 |
| 24  | H      | 2  | 1  | 21 | 1.085602 | 121.2088 | -179.024 | 0.525497 | -2.44948 | 0.455683 |
| 25  | H      | 7  | 6  | 5  | 1.084234 | 119.3774 | 172.2243 | -3.75761 | 1.783127 | 0.13856  |
| 26  | H      | 9  | 8  | 7  | 1.08436  | 118.2349 | 178.8043 | -0.29837 | 4.240845 | -0.39253 |
| 27  | H      | 10 | 9  | 8  | 1.083821 | 119.2358 | 175.0864 | 1.223821 | 2.313095 | -0.25436 |

|    |   |    |    |    |          |          |          |          |          |          |
|----|---|----|----|----|----------|----------|----------|----------|----------|----------|
| 28 | H | 11 | 4  | 3  | 1.085177 | 119.3578 | -0.51561 | 2.205575 | 1.177455 | 1.668646 |
| 29 | H | 12 | 11 | 4  | 1.084549 | 121.6034 | -179.533 | 4.696424 | 1.19188  | 1.567881 |
| 30 | H | 14 | 13 | 12 | 1.084538 | 119.6588 | -179.87  | 4.596514 | -1.66717 | -1.61984 |
| 31 | H | 15 | 14 | 13 | 1.08586  | 119.2888 | 179.6623 | 2.104211 | -1.67989 | -1.53847 |
| 32 | H | 19 | 18 | 1  | 1.083106 | 118.0513 | -175.516 | -4.80494 | -2.94146 | 0.245296 |
| 33 | H | 20 | 19 | 18 | 1.084264 | 122.635  | 177.8897 | -4.6061  | -0.40649 | -0.1597  |

**Table S5.** Bond angles and Bond distances (Å) for **3ThDpF**

| Tag | Symbol | NA | NB | NC | Bond     | Angle    | Dihedral | X        | Y        | Z        |
|-----|--------|----|----|----|----------|----------|----------|----------|----------|----------|
| 1   | C      |    |    |    |          |          |          | 1.796488 | -1.7586  | 0.081111 |
| 2   | C      | 1  |    |    | 1.464066 |          |          | 0.34663  | -1.56957 | 0.156385 |
| 3   | C      | 2  | 1  |    | 1.356935 | 130.624  |          | -0.40338 | -0.44253 | 0.063879 |
| 4   | C      | 3  | 2  | 1  | 1.487458 | 119.9016 | 173.3974 | -1.88721 | -0.54013 | 0.028274 |
| 5   | C      | 3  | 2  | 1  | 1.493935 | 123.2625 | -8.21328 | 0.182758 | 0.93116  | 0.028573 |
| 6   | C      | 5  | 3  | 2  | 1.404643 | 120.8413 | -60.0439 | 0.964534 | 1.4081   | 1.093644 |
| 7   | C      | 6  | 5  | 3  | 1.393721 | 121.197  | -178.928 | 1.496572 | 2.696184 | 1.078405 |
| 8   | C      | 7  | 6  | 5  | 1.390348 | 118.6784 | -0.00679 | 1.2397   | 3.511246 | -0.0183  |
| 9   | C      | 8  | 7  | 6  | 1.390087 | 121.9219 | 0.391456 | 0.464662 | 3.080378 | -1.08882 |
| 10  | C      | 9  | 8  | 7  | 1.394313 | 118.6359 | 0.027674 | -0.06706 | 1.791932 | -1.05296 |
| 11  | C      | 4  | 3  | 2  | 1.407798 | 120.8392 | 145.6066 | -2.69008 | 0.448954 | 0.627443 |
| 12  | C      | 11 | 4  | 3  | 1.392364 | 121.4647 | -178.32  | -4.07914 | 0.353127 | 0.631946 |
| 13  | C      | 12 | 11 | 4  | 1.389983 | 118.7903 | -0.55298 | -4.67661 | -0.74176 | 0.018513 |
| 14  | C      | 13 | 12 | 11 | 1.389869 | 121.729  | -0.36804 | -3.92466 | -1.73256 | -0.60167 |
| 15  | C      | 14 | 13 | 12 | 1.392635 | 118.7488 | 0.348212 | -2.53649 | -1.62124 | -0.59751 |
| 16  | F      | 13 | 12 | 11 | 1.349685 | 119.1458 | -179.637 | -6.02284 | -0.83811 | 0.012205 |
| 17  | F      | 8  | 7  | 6  | 1.349482 | 119.0383 | -179.902 | 1.752946 | 4.759101 | -0.04153 |
| 18  | C      | 1  | 2  | 3  | 1.380258 | 128.2717 | -19.2937 | 2.742854 | -0.9083  | -0.45415 |
| 19  | S      | 18 | 1  | 2  | 1.728388 | 112.4082 | -177.464 | 4.337306 | -1.57221 | -0.38873 |
| 20  | C      | 19 | 18 | 1  | 1.736044 | 91.65587 | 0.134868 | 3.75613  | -3.02435 | 0.364499 |

|    |   |    |    |    |          |          |          |          |          |          |
|----|---|----|----|----|----------|----------|----------|----------|----------|----------|
| 21 | C | 20 | 19 | 18 | 1.362672 | 111.2201 | 0.200383 | 2.405796 | -2.98133 | 0.542324 |
| 22 | H | 2  | 1  | 18 | 1.088355 | 113.1465 | 160.1202 | -0.19909 | -2.49985 | 0.302269 |
| 23 | H | 6  | 5  | 3  | 1.085099 | 119.1991 | 1.267001 | 1.158331 | 0.758077 | 1.940611 |
| 24 | H | 7  | 6  | 5  | 1.08454  | 121.6676 | 179.7441 | 2.097744 | 3.07364  | 1.898373 |
| 25 | H | 9  | 8  | 7  | 1.084536 | 119.668  | 179.7439 | 0.284099 | 3.748294 | -1.92398 |
| 26 | H | 10 | 9  | 8  | 1.08569  | 119.419  | 179.4243 | -0.68203 | 1.445661 | -1.87797 |
| 27 | H | 11 | 4  | 3  | 1.084795 | 119.3727 | 0.866117 | -2.21737 | 1.298798 | 1.108155 |
| 28 | H | 12 | 11 | 4  | 1.08458  | 121.5731 | 179.3026 | -4.69894 | 1.108441 | 1.10275  |
| 29 | H | 14 | 13 | 12 | 1.084598 | 119.645  | -178.508 | -4.42693 | -2.5599  | -1.09115 |
| 30 | H | 15 | 14 | 13 | 1.085118 | 119.102  | -177.79  | -1.94526 | -2.37233 | -1.11112 |
| 31 | H | 18 | 1  | 21 | 1.078974 | 128.0745 | 178.5575 | 2.58968  | 0.063856 | -0.89645 |
| 32 | H | 20 | 19 | 18 | 1.080737 | 120.2919 | -179.765 | 4.444404 | -3.81479 | 0.628094 |
| 33 | H | 21 | 20 | 19 | 1.084719 | 123.3094 | 179.8918 | 1.838524 | -3.78777 | 0.994507 |

**Table S6.** Bond angles and Bond distances (Å) for **3ThDpF(C)**

| Tag | Symbol | NA | NB | NC | Bond     | Angle    | Dihedral | X        | Y        | Z        |
|-----|--------|----|----|----|----------|----------|----------|----------|----------|----------|
| 1   | C      |    |    |    |          |          |          | -1.32713 | -1.9393  | 0.012913 |
| 2   | C      | 1  |    |    | 1.359007 |          |          | 0.004052 | -1.72085 | 0.177642 |
| 3   | C      | 2  | 1  |    | 1.451401 | 121.6049 |          | 0.571393 | -0.38722 | 0.099412 |
| 4   | C      | 3  | 2  | 1  | 1.488807 | 116.6479 | -169.234 | 2.056485 | -0.29528 | 0.048477 |
| 5   | C      | 3  | 2  | 1  | 1.381425 | 119.7496 | 11.96755 | -0.26291 | 0.713811 | 0.101036 |
| 6   | C      | 5  | 3  | 2  | 1.543854 | 118.4851 | 8.149043 | -1.76628 | 0.498044 | 0.378165 |
| 7   | C      | 6  | 5  | 3  | 1.509349 | 114.2008 | -168.009 | -2.62917 | 1.699939 | 0.079829 |
| 8   | C      | 7  | 6  | 5  | 1.337885 | 120.5272 | -13.2041 | -2.07486 | 2.899701 | -0.12812 |
| 9   | C      | 8  | 7  | 6  | 1.445453 | 123.5313 | 5.546648 | -0.64787 | 3.118171 | -0.20088 |
| 10  | C      | 9  | 8  | 7  | 1.357469 | 119.8015 | 2.368783 | 0.201895 | 2.064139 | -0.10269 |
| 11  | C      | 4  | 3  | 2  | 1.405999 | 121.8544 | -126.451 | 2.782027 | 0.501422 | 0.951635 |
| 12  | C      | 11 | 4  | 3  | 1.393766 | 121.3506 | 178.0769 | 4.174617 | 0.549011 | 0.9198   |
| 13  | C      | 12 | 11 | 4  | 1.389661 | 118.7362 | -0.33933 | 4.847888 | -0.21684 | -0.02431 |

|    |   |    |    |    |          |          |          |          |          |          |
|----|---|----|----|----|----------|----------|----------|----------|----------|----------|
| 14 | C | 13 | 12 | 11 | 1.389969 | 121.8192 | -0.32252 | 4.171149 | -1.02866 | -0.92707 |
| 15 | C | 14 | 13 | 12 | 1.393208 | 118.6717 | 0.227582 | 2.779238 | -1.06557 | -0.87966 |
| 16 | F | 13 | 12 | 11 | 1.34936  | 119.0947 | -179.948 | 6.196165 | -0.17705 | -0.06087 |
| 17 | F | 8  | 7  | 6  | 1.352794 | 120.8701 | -176.765 | -2.844   | 3.993795 | -0.33168 |
| 18 | C | 1  | 2  | 3  | 1.439957 | 129.2511 | -176.757 | -2.06841 | -3.16932 | 0.117969 |
| 19 | C | 18 | 1  | 2  | 1.353236 | 113.6866 | 168.5031 | -3.41032 | -2.99552 | 0.135644 |
| 20 | S | 19 | 18 | 1  | 1.761009 | 115.4791 | -0.33842 | -3.95923 | -1.32514 | 0.03736  |
| 21 | C | 1  | 2  | 3  | 1.518718 | 118.758  | 3.59063  | -2.22211 | -0.76441 | -0.34082 |
| 22 | H | 21 | 1  | 2  | 1.102257 | 109.1328 | 83.75066 | -2.19007 | -0.60106 | -1.43044 |
| 23 | H | 6  | 5  | 3  | 1.110878 | 106.3835 | 73.4526  | -1.85674 | 0.280662 | 1.463805 |
| 24 | H | 2  | 1  | 18 | 1.086281 | 120.067  | 3.012743 | 0.671763 | -2.55419 | 0.376931 |
| 25 | H | 7  | 6  | 5  | 1.085056 | 119.1125 | 171.2773 | -3.70876 | 1.594884 | 0.108315 |
| 26 | H | 9  | 8  | 7  | 1.084368 | 118.2202 | 179.1608 | -0.29218 | 4.125537 | -0.38677 |
| 27 | H | 10 | 9  | 8  | 1.083807 | 119.2314 | 175.0292 | 1.264696 | 2.226602 | -0.23942 |
| 28 | H | 11 | 4  | 3  | 1.08525  | 119.3548 | -0.68024 | 2.248279 | 1.075825 | 1.701929 |
| 29 | H | 12 | 11 | 4  | 1.084545 | 121.6096 | -179.538 | 4.738773 | 1.156335 | 1.619175 |
| 30 | H | 14 | 13 | 12 | 1.084542 | 119.6504 | -179.956 | 4.732106 | -1.6123  | -1.64882 |
| 31 | H | 15 | 14 | 13 | 1.085848 | 119.2996 | 179.609  | 2.239943 | -1.69137 | -1.58436 |
| 32 | H | 18 | 1  | 2  | 1.08471  | 123.0153 | -8.82416 | -1.59305 | -4.13902 | 0.219503 |
| 33 | H | 19 | 18 | 1  | 1.08341  | 126.125  | -179.162 | -4.15466 | -3.77807 | 0.221447 |

**Table S7.** Calculated HOMO, LUMO distributions, energy levels, energy gap and vertical excitation wavelengths for **2ThDpF**, **2ThDpF(C)**, **3ThDpF** and **3ThDpF(C)**.

| Sample    | LUMO                                                                                | HOMO                                                                                | $E_{\text{LUMO}}$<br>(eV) | $E_{\text{HOMO}}$<br>(eV) | $\Delta E_{\text{g}}$<br>(eV) | Vertical excitation<br>wavelength<br>(nm) |
|-----------|-------------------------------------------------------------------------------------|-------------------------------------------------------------------------------------|---------------------------|---------------------------|-------------------------------|-------------------------------------------|
| 2ThDpF    | 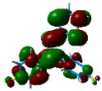 |  | -1.91                     | -5.82                     | 3.91                          | 338                                       |
| 2ThDpF(C) |  |  | -2.32                     | -5.31                     | 2.99                          | 480                                       |

|           |                                                                                   |                                                                                   |       |       |      |     |
|-----------|-----------------------------------------------------------------------------------|-----------------------------------------------------------------------------------|-------|-------|------|-----|
| 3ThDpF    | 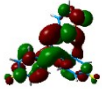 |  | -1.76 | -5.94 | 4.18 | 323 |
| 3ThDpF(C) |  |  | -2.51 | -5.29 | 2.78 | 512 |

---

**Reference:**

[1] T. Gbttner, F. Hampel, J.-P. Gisselbrecht, A. Hirsch, *Chem. Eur. J.*, **2002**, 8, 408.
